# Supplementary material
Source: bioRxiv or medRxiv preprint supplement (https://www.biorxiv.org/highwire/filestream/101088/field_highwire_adjunct_files/4/324509-13.pdf)
Supplement: Supplementary file [file 324509-13.pdf]

**Supplementary Table 5. Virus neutralization by 3BNC117**

| PPT | Source        | Method             | Virus ID       | 3BNC117 IC <sub>50</sub> | 3BNC117 IC <sub>80</sub> |
|-----|---------------|--------------------|----------------|--------------------------|--------------------------|
| 601 | Reservoir     | Bulk culture       | 601 Bulk       | 3.031                    | 9.205                    |
|     | Reservoir     | Q <sup>2</sup> VOA | 601 D-14 MB22  | >50                      | >50                      |
|     | Reservoir     | Q <sup>2</sup> VOA | 601 D-14 MG10  | >50                      | >50                      |
|     | Reservoir     | Q <sup>2</sup> VOA | 601 D-14 MB9   | >50                      | >50                      |
|     | Reservoir     | Q <sup>2</sup> VOA | 601 D-14 MD5   | 1.467                    | 6.592                    |
|     | Reservoir     | Q <sup>2</sup> VOA | 601 D-14 MG19  | 9.235                    | 28.203                   |
|     | Reservoir     | Q <sup>2</sup> VOA | 601 W23 MA17   | 1.605                    | 4.005                    |
|     | Reservoir     | Q <sup>2</sup> VOA | 601 W23 MO6    | 6.842                    | >50                      |
|     | Reservoir     | Q <sup>2</sup> VOA | 601 W23 MQ17   | >50                      | >50                      |
|     | Reservoir     | Q <sup>2</sup> VOA | 601 W23 MQ19   | >50                      | >50                      |
|     | Rebound virus | Bulk culture       | 601 W29 F Bulk | >50                      | >50                      |
| 602 | Reservoir     | Bulk culture       | 602 Bulk       | 3.206                    | 8.671                    |
|     | Reservoir     | Q <sup>2</sup> VOA | 602 W23 F5     | 2.686                    | 10.026                   |
|     | Reservoir     | Q <sup>2</sup> VOA | 602 W23 M6     | 3.959                    | 24.951                   |
|     | Reservoir     | Q <sup>2</sup> VOA | 602 W23 P2     | 0.948                    | 2.532                    |
|     | Reservoir     | Q <sup>2</sup> VOA | 602 W23 Y7     | 0.733                    | 2.417                    |
|     | Rebound virus | Bulk culture       | 602 W28 F Bulk | 6.036                    | 23.885                   |
| 603 | Reservoir     | Bulk culture       | 603 Bulk       | 0.513                    | >20                      |
|     | Reservoir     | Q <sup>2</sup> VOA | 603 D-14 N17   | 0.758                    | >50                      |
|     | Reservoir     | Q <sup>2</sup> VOA | 603 W23 MB6    | 6.718                    | >50                      |
|     | Reservoir     | Q <sup>2</sup> VOA | 603 W23 MC11   | 1.969                    | >50                      |
|     | Reservoir     | Q <sup>2</sup> VOA | 603 W23 B9     | 3.381                    | >50                      |
|     | Rebound virus | Bulk culture       | 603 W31 F Bulk | 4.337                    | 12.110                   |
| 605 | Reservoir     | Bulk culture       | 605 Bulk       | 0.486                    | 2.133                    |
|     | Reservoir     | Q <sup>2</sup> VOA | 605 W23 ME7    | 2.507                    | 8.203                    |
|     | Reservoir     | Q <sup>2</sup> VOA | 605 W23 ME9    | 2.862                    | 10.183                   |
|     | Reservoir     | Q <sup>2</sup> VOA | 605 W23 MF12   | 1.870                    | 6.541                    |
|     | Reservoir     | Q <sup>2</sup> VOA | 605 W23 MG14   | 3.202                    | 9.368                    |
|     | Reservoir     | Q <sup>2</sup> VOA | 605 W23 MH10   | 2.442                    | 9.03                     |
|     | Reservoir     | Q <sup>2</sup> VOA | 605 W23 MK10   | 2.907                    | 10.243                   |
|     | Reservoir     | Q <sup>2</sup> VOA | 605 W23 MK15   | 0.974                    | 3.43                     |
|     | Rebound virus | Bulk culture       | 605 W23 MK18   | 3.187                    | 11.288                   |
|     | Rebound virus | Bulk culture       | 605 W29 F Bulk | 3.066                    | 11.188                   |
| 608 | Reservoir     | Bulk culture       | 608 Bulk       | >20                      | >20                      |
|     | Reservoir     | Q <sup>2</sup> VOA | 608 D-14 MF4   | >50                      | >50                      |
|     | Reservoir     | Q <sup>2</sup> VOA | 608 W23 MS9    | >50                      | >50                      |
|     | Reservoir     | Q <sup>2</sup> VOA | 608 W23 MJ5    | >50                      | >50                      |
|     | Reservoir     | Q <sup>2</sup> VOA | 608 W23 MK24   | >50                      | >50                      |
|     | Reservoir     | Q <sup>2</sup> VOA | 608 W23 MP12   | >50                      | >50                      |
|     | Reservoir     | Q <sup>2</sup> VOA | 608 D-14 MB4   | >50                      | >50                      |
|     | Rebound virus | Bulk culture       | 608 W30 F Bulk | >50                      | >50                      |
| 609 | Reservoir     | Bulk culture       | 609 Bulk       | 0.136                    | 0.301                    |
|     | Reservoir     | Q <sup>2</sup> VOA | 609 MI21       | 0.193                    | 0.514                    |
|     | Reservoir     | Q <sup>2</sup> VOA | 609 D-14 12 11 | 0.154                    | 0.59                     |
|     | Reservoir     | Q <sup>2</sup> VOA | 609 D-14 MD14  | 0.230                    | 0.898                    |
|     | Reservoir     | Q <sup>2</sup> VOA | 609 D-14 MF13  | 0.118                    | 0.337                    |
|     | Reservoir     | Q <sup>2</sup> VOA | 609 D-14 MG11  | 0.788                    | 2.629                    |
|     | Reservoir     | Q <sup>2</sup> VOA | 609 D-14 MI15  | 0.320                    | 0.901                    |
|     | Rebound virus | Bulk culture       | 609 W32 F Bulk | 1.674                    | 4.481                    |
| 610 | Reservoir     | Bulk culture       | 610 Bulk       | 0.324                    | 1.091                    |
|     | Reservoir     | Q <sup>2</sup> VOA | 610 D-14 MB17  | 0.813                    | 2.199                    |
|     | Reservoir     | Q <sup>2</sup> VOA | 610 D-14 MB8   | 0.853                    | 3.109                    |
|     | Reservoir     | Q <sup>2</sup> VOA | 610 D-14 ME17  | 0.436                    | 1.267                    |
|     | Reservoir     | Q <sup>2</sup> VOA | 610 W23 MI14   | 0.395                    | 1.315                    |
|     | Reservoir     | Q <sup>2</sup> VOA | 610 W23 MJ3    | 0.720                    | 1.888                    |
|     | Rebound virus | Bulk culture       | 610 W31 F Bulk | 0.490                    | 1.678                    |

**Supplementary Table 5 continued.** Virus neutralization by 3BNC117

| PPT | Source    | Method             | Virus ID          | 3BNC117 IC <sub>50</sub> | 3BNC117 IC <sub>80</sub> |
|-----|-----------|--------------------|-------------------|--------------------------|--------------------------|
| 611 | Reservoir | Bulk culture       | 611 Bulk          | 1.018                    | 2.782                    |
|     | Reservoir | Q <sup>2</sup> VOA | 611 D-14 2G 18    | 1.175                    | 3.371                    |
|     | Reservoir | Q <sup>2</sup> VOA | 611 D-14 2i 20    | 1.973                    | 3.61                     |
|     | Reservoir | Q <sup>2</sup> VOA | 611 D-14 B23      | 0.604                    | 2.427                    |
|     | Reservoir | Q <sup>2</sup> VOA | 611 D-14 MH8      | 1.256                    | 4.444                    |
|     | Reservoir | Q <sup>2</sup> VOA | 611 D-14 MH12     | 0.482                    | 1.682                    |
|     | Reservoir | Q <sup>2</sup> VOA | 611 D-14 MH7      | 0.447                    | 1.574                    |
|     | Reservoir | Q <sup>2</sup> VOA | 611 D-14 MI10     | 0.795                    | 2.153                    |
|     | Reservoir | Q <sup>2</sup> VOA | 611 D-14 MJ3      | 0.749                    | 2.503                    |
|     | Reservoir | Q <sup>2</sup> VOA | 611 D-14 MK21     | 0.545                    | 2.046                    |
|     | Reservoir | Q <sup>2</sup> VOA | 611 W23 MC1       | 0.572                    | 2.437                    |
|     | Reservoir | Q <sup>2</sup> VOA | 611 W23 MC23      | 0.147                    | 0.489                    |
|     | Reservoir | Q <sup>2</sup> VOA | 611 W23 MS1       | 0.163                    | 0.439                    |
|     | Reservoir | Q <sup>2</sup> VOA | 611 W23 MS14      | 0.599                    | 1.935                    |
|     | Reservoir | Q <sup>2</sup> VOA | 611 W23 MS13      | 0.514                    | 1.83                     |
| 613 | Reservoir | Bulk culture       | 613 Bulk          | 0.996                    | 2.479                    |
|     | Reservoir | Q <sup>2</sup> VOA | 613 W23 MS18      | 0.148                    | 0.484                    |
|     | Reservoir | Q <sup>2</sup> VOA | 613 D-14 C16      | 0.995                    | 8.987                    |
|     | Reservoir | Q <sup>2</sup> VOA | 613 D-14 C6       | 0.612                    | 1.337                    |
|     | Reservoir | Q <sup>2</sup> VOA | 613 D-14 D15      | 0.412                    | 2.23                     |
|     | Reservoir | Q <sup>2</sup> VOA | 613 D-14 F12      | 0.341                    | 0.88                     |
|     | Reservoir | Q <sup>2</sup> VOA | 613 D-14 MB10     | 0.590                    | 1.846                    |
| 616 | Reservoir | Q <sup>2</sup> VOA | 613 D-14 MB23     | 0.265                    | 0.872                    |
|     | Reservoir | Bulk culture       | 616 Bulk          | 0.371                    | 1.102                    |
|     | Reservoir | Q <sup>2</sup> VOA | 616 D-14 300K B12 | 0.347                    | 0.817                    |
|     | Reservoir | Q <sup>2</sup> VOA | 616 D-14 MF8      | 0.298                    | 0.989                    |
|     | Reservoir | Q <sup>2</sup> VOA | 616 D-14 MF21     | 0.245                    | 0.781                    |
|     | Reservoir | Q <sup>2</sup> VOA | 616 D-14 MA11     | 0.262                    | 0.856                    |
|     | Reservoir | Q <sup>2</sup> VOA | 616 D-14 300K A19 | 0.281                    | 0.956                    |
| 616 | Reservoir | Q <sup>2</sup> VOA | 616 W23 MU12      | 0.377                    | 1.4                      |
|     | Reservoir | Q <sup>2</sup> VOA | 616 W23 MU18      | 0.323                    | 0.93                     |
